# Supplementary material for: Systematic analysis of lysine acetylome and succinylome reveals the correlation between modification of H2A.X complexes and DNA damage response in breast cancer
Source: PubMed Central journal article supplement — Oncol Rep. 2020 Mar 19;43(6):1819–30. doi: 10.3892/or.2020.7554 (PMC7160542; doi:10.3892/or.2020.7554), 2020-03-19
Supplement: Supplementary_Data.pdf [file Supplementary_Data.pdf]

Figure S1. Quality control validation of MS data. (A-C) Mass error distribution of all peptides identified in the acetylome, succinylome and quantitative proteome, respectively. (D-F) Length distribution of peptides identified in the acetylome, succinylome and quantitative proteome, respectively.

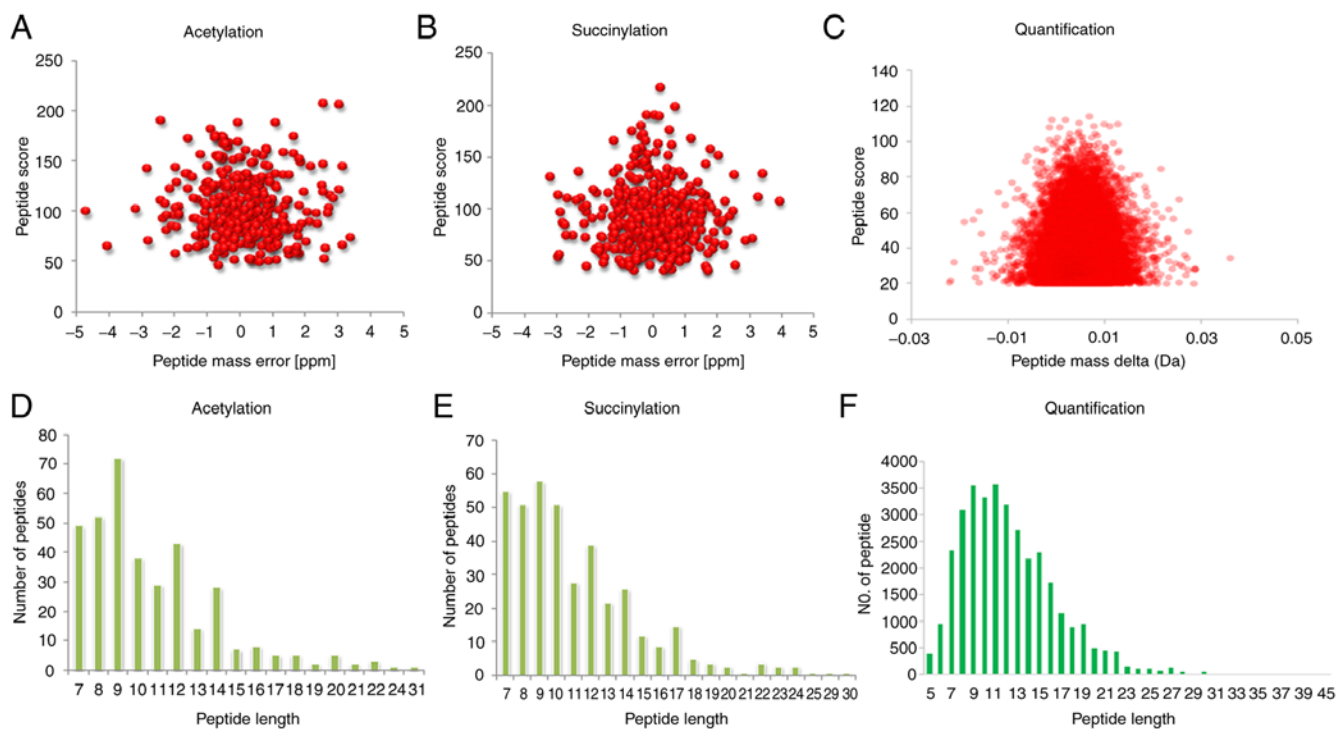

Figure S2. Comparison of modification level between breast cancer tissue and normal tissue. Comparison of acetylation level (A) and succinylation level (B) between breast cancer tissue and normal tissue. Data are medians and were analyzed using Wilcoxon Signed Rank Test.  $**P < 0.01$ .

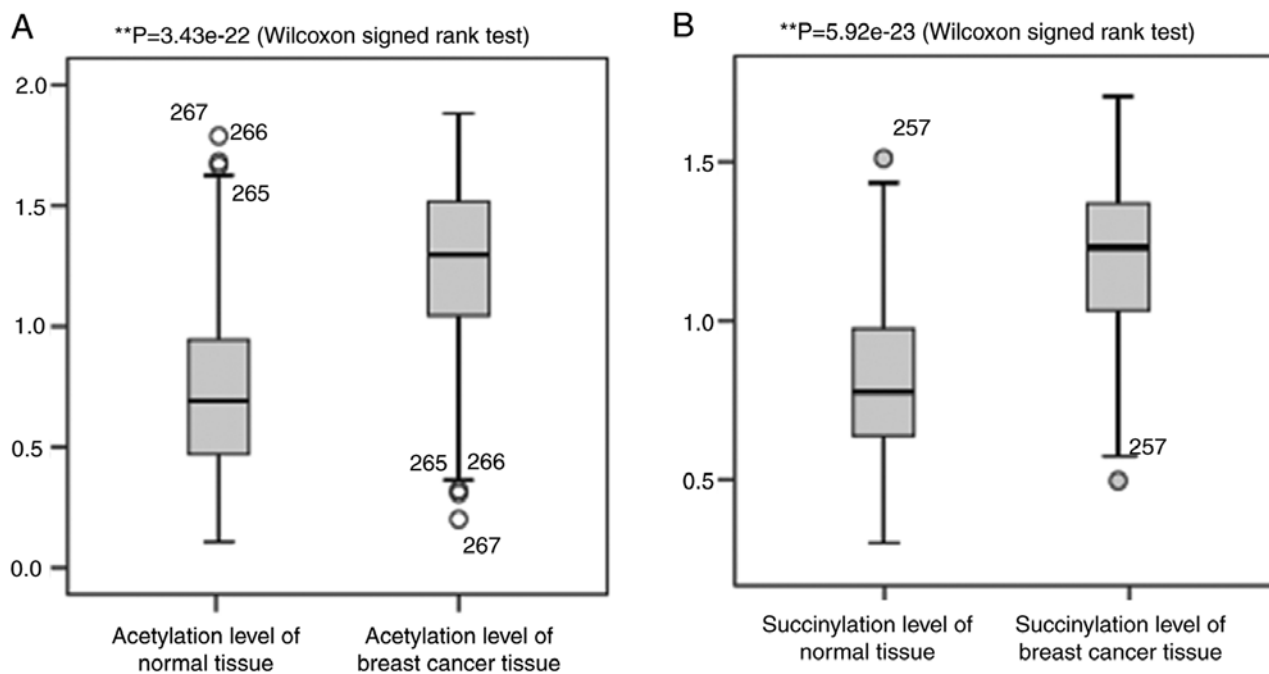

Table SI. Protein sites whose acetylation and succinylation levels were both significantly upregulated in breast cancer tissues (fold change  $\geq 1.5$  compared with normal tissues).

| Protein ID | Protein name | Modification site |
|------------|--------------|-------------------|
| P54868     | HMCS2        | 310K              |
| Q15063     | POSTN        | 549K              |
| Q99715     | COCA1        | 1601K             |
| P51572     | BAP31        | 72K               |
| P07237     | PDLA1        | 328K              |
| Q06830     | PRDX1        | 192K              |
| P48735     | IDHP         | 180K              |
| P30101     | PDIA3        | 417K              |
| P0DMV9     | HS71B        | 526K              |
| Q01995     | TAGL         | 21K               |
| P06748     | NPM1         | 27K               |
| Q00325     | MPCP         | 209K              |
| P00488     | F13A         | 69K               |
| P02545     | LMNA         | 260K              |
| P08133     | ANXA6        | 478K              |
| P02452     | CO1A1        | 751K              |

Table SII. Protein sites whose acetylation and succinylation levels were both significantly downregulated in breast cancer tissues (fold change  $\geq 1.5$  compared with normal tissues).

| Protein ID | Protein name | Modification site |
|------------|--------------|-------------------|
| RET4       | P02753       | 30K               |
| PSG2       | P07585       | 142K              |
| HBA        | P69905       | 12K               |
| IGKC       | P01834       | 80K               |
| HBA        | P69905       | 8K                |

Table SIII. All proteins whose expression level were significantly upregulated in breast cancer tissues (fold change  $\geq 1.5$  compared with normal tissues).

| Protein ID | Protein description                                                                                       | Ratio (cancer vs. normal) | P-value  |
|------------|-----------------------------------------------------------------------------------------------------------|---------------------------|----------|
| P29762     | Cellular retinoic acid-binding protein 1 OS= <i>Homo sapiens</i> GN=CRABP1 PE=2 SV=2                      | 4.5485                    | 0.005237 |
| P05787     | Keratin, type II cytoskeletal 8 OS= <i>Homo sapiens</i> GN=KRT8 PE=1 SV=7                                 | 3.3785                    | 3.49E-13 |
| Q01105     | Protein SET OS= <i>Homo sapiens</i> GN=SET PE=1 SV=3                                                      | 2.846                     | 0.000294 |
| Q9NZJ9     | Diphosphoinositol polyphosphate phosphohydrolase 2 OS= <i>Homo sapiens</i> GN=NUDT4 PE=1 SV=2             | 2.814                     | 0.002214 |
| P40121     | Macrophage-capping protein OS= <i>Homo sapiens</i> GN=CAPG PE=1 SV=2                                      | 2.808                     | 0.0001   |
| Q8WX93     | Palladin OS= <i>Homo sapiens</i> GN=PALLD PE=1 SV=3                                                       | 2.7565                    | 5.55E-06 |
| Q9UQP3     | Tenascin-N OS= <i>Homo sapiens</i> GN=TNN PE=1 SV=2                                                       | 2.724                     | 0.00859  |
| P15924     | Desmoplakin OS= <i>Homo sapiens</i> GN=DSP PE=1 SV=3                                                      | 2.7135                    | 3.49E-14 |
| Q13153     | Serine/threonine-protein kinase PAK 1 OS= <i>Homo sapiens</i> GN=PAK1 PE=1 SV=2                           | 2.713                     | 0.003549 |
| P23528     | Cofilin-1 OS= <i>Homo sapiens</i> GN=CFL1 PE=1 SV=3                                                       | 2.702                     | 1.4E-08  |
| Q12874     | Splicing factor 3A subunit 3 OS= <i>Homo sapiens</i> GN=SF3A3 PE=1 SV=1                                   | 2.699                     | 0.009968 |
| Q15063     | Periostin OS= <i>Homo sapiens</i> GN=POSTN PE=1 SV=2                                                      | 2.6945                    | 1.37E-12 |
| Q13185     | Chromobox protein homolog 3 OS= <i>Homo sapiens</i> GN=CBX3 PE=1 SV=4                                     | 2.6695                    | 0.00138  |
| Q8TF66     | Leucine-rich repeat-containing protein 15 OS= <i>Homo sapiens</i> GN=LRRRC15 PE=1 SV=2                    | 2.661                     | 0.002947 |
| Q6P996     | Pyridoxal-dependent decarboxylase domain-containing protein 1 OS= <i>Homo sapiens</i> GN=PDXDC1 PE=1 SV=2 | 2.635                     | 1.09E-05 |
| P35442     | Thrombospondin-2 OS= <i>Homo sapiens</i> GN=THBS2 PE=1 SV=2                                               | 2.621                     | 7.37E-05 |
| P13611     | Versican core protein OS= <i>Homo sapiens</i> GN=VCAN PE=1 SV=3                                           | 2.617                     | 4.99E-06 |
| Q00688     | Peptidyl-prolyl cis-trans isomerase FKBP3 OS= <i>Homo sapiens</i> GN=FKBP3 PE=1 SV=1                      | 2.529                     | 0.006514 |
| P08727     | Keratin, type I cytoskeletal 19 OS= <i>Homo sapiens</i> GN=KRT19 PE=1 SV=4                                | 2.493                     | 1.01E-10 |
| Q02790     | Peptidyl-prolyl cis-trans isomerase FKBP4 OS= <i>Homo sapiens</i> GN=FKBP4 PE=1 SV=3                      | 2.465                     | 8.29E-05 |
| P22626     | Heterogeneous nuclear ribonucleoproteins A2/B1 OS= <i>Homo sapiens</i> GN=HNRNPA2B1 PE=1 SV=2             | 2.459                     | 2.66E-07 |
| Q05682     | Caldesmon OS= <i>Homo sapiens</i> GN=CALD1 PE=1 SV=3                                                      | 2.4345                    | 2.5E-06  |
| Q9P258     | Protein RCC2 OS= <i>Homo sapiens</i> GN=RCC2 PE=1 SV=2                                                    | 2.4015                    | 0.009156 |
| P30520     | Adenylosuccinate synthetase isozyme 2 OS= <i>Homo sapiens</i> GN=ADSS PE=1 SV=3                           | 2.391                     | 0.003515 |
| Q5SSJ5     | Heterochromatin protein 1-binding protein 3 OS= <i>Homo sapiens</i> GN=HP1BP3 PE=1 SV=1                   | 2.375                     | 0.001099 |
| P05783     | Keratin, type I cytoskeletal 18 OS= <i>Homo sapiens</i> GN=KRT18 PE=1 SV=2                                | 2.3525                    | 1.38E-08 |
| P21266     | Glutathione S-transferase Mu 3 OS= <i>Homo sapiens</i> GN=GSTM3 PE=1 SV=3                                 | 2.348                     | 2.27E-05 |
| Q6EEV6     | Small ubiquitin-related modifier 4 OS= <i>Homo sapiens</i> GN=SUMO4 PE=1 SV=2                             | 2.311                     | 0.008154 |
| P10253     | Lysosomal alpha-glucosidase OS= <i>Homo sapiens</i> GN=GAA PE=1 SV=4                                      | 2.2855                    | 0.001327 |
| P17844     | Probable ATP-dependent RNA helicase DDX5 OS= <i>Homo sapiens</i> GN=DDX5 PE=1 SV=1                        | 2.249                     | 0.000284 |
| P50454     | Serpin H1 OS= <i>Homo sapiens</i> GN=SERPINH1 PE=1 SV=2                                                   | 2.211                     | 6.02E-06 |
| P23193     | Transcription elongation factor A protein 1 OS= <i>Homo sapiens</i> GN=TCEA1 PE=1 SV=2                    | 2.203                     | 0.004442 |
| P39748     | Flap endonuclease 1 OS= <i>Homo sapiens</i> GN=FEN1 PE=1 SV=1                                             | 2.197                     | 0.005466 |
| Q8TE77     | Protein phosphatase Slingshot homolog 3 OS= <i>Homo sapiens</i> GN=SSH3 PE=1 SV=2                         | 2.185                     | 0.0028   |
| P0CW22     | 40S ribosomal protein S17-like OS= <i>Homo sapiens</i> GN=RPS17L PE=1 SV=1                                | 2.171                     | 0.007463 |
| Q92544     | Transmembrane 9 superfamily member 4 OS= <i>Homo sapiens</i> GN=TM9SF4 PE=1 SV=2                          | 2.17                      | 0.003809 |
| P10155     | 60 kDa SS-A/Ro ribonucleoprotein OS= <i>Homo sapiens</i> GN=TROVE2 PE=1 SV=2                              | 2.168                     | 0.000968 |
| P63208     | S-phase kinase-associated protein 1 OS= <i>Homo sapiens</i> GN=SKP1 PE=1 SV=2                             | 2.165                     | 0.000695 |

Table SIII. Continued.

| Protein ID | Protein description                                                                                          | Ratio (cancer vs. normal) | P-value  |
|------------|--------------------------------------------------------------------------------------------------------------|---------------------------|----------|
| Q8IV36     | Protein HID1 OS= <i>Homo sapiens</i> GN=HID1 PE=1 SV=1                                                       | 2.1405                    | 0.002398 |
| Q9Y266     | Nuclear migration protein nudC OS= <i>Homo sapiens</i> GN=NUDC PE=1 SV=1                                     | 2.124                     | 3.41E-06 |
| P62753     | 40S ribosomal protein S6 OS= <i>Homo sapiens</i> GN=RPS6 PE=1 SV=1                                           | 2.113                     | 0.004002 |
| P15170     | Eukaryotic peptide chain release factor GTP-binding subunit ERF3A OS= <i>Homo sapiens</i> GN=GSPT1 PE=1 SV=1 | 2.109                     | 0.006605 |
| Q13148     | TAR DNA-binding protein 43 OS= <i>Homo sapiens</i> GN=TARDBP PE=1 SV=1                                       | 2.092                     | 5.22E-05 |
| Q9Y2X3     | Nucleolar protein 58 OS= <i>Homo sapiens</i> GN=NOP58 PE=1 SV=1                                              | 2.087                     | 0.005814 |
| Q99715     | Collagen alpha-1(XII) chain OS= <i>Homo sapiens</i> GN=COL12A1 PE=1 SV=2                                     | 2.084                     | 1.36E-11 |
| Q9UGI8     | Testin OS= <i>Homo sapiens</i> GN=TES PE=1 SV=1                                                              | 2.08                      | 0.001602 |
| O43390     | Heterogeneous nuclear ribonucleoprotein R OS= <i>Homo sapiens</i> GN=HNRNPR PE=1 SV=1                        | 2.069                     | 5.72E-05 |
| P52272     | Heterogeneous nuclear ribonucleoprotein M OS= <i>Homo sapiens</i> GN=HNRNPM PE=1 SV=3                        | 2.066                     | 8.9E-08  |
| P12830     | Cadherin-1 OS= <i>Homo sapiens</i> GN=CDH1 PE=1 SV=3                                                         | 2.0585                    | 1.43E-05 |
| P26373     | 60S ribosomal protein L13 OS= <i>Homo sapiens</i> GN=RPL13 PE=1 SV=4                                         | 2.047                     | 0.006719 |
| P08621     | U1 small nuclear ribonucleoprotein 70 kDa OS= <i>Homo sapiens</i> GN=SNRNP70 PE=1 SV=2                       | 2.045                     | 0.000827 |
| Q9UNE7     | E3 ubiquitin-protein ligase CHIP OS= <i>Homo sapiens</i> GN=STUB1 PE=1 SV=2                                  | 2.043                     | 0.000282 |
| P22234     | Multifunctional protein ADE2 OS= <i>Homo sapiens</i> GN=PAICS PE=1 SV=3                                      | 2.04                      | 0.005675 |
| Q15233     | Non-POU domain-containing octamer-binding protein OS= <i>Homo sapiens</i> GN=NONO PE=1 SV=4                  | 2.0385                    | 1.4E-08  |
| P50851     | Lipopolysaccharide-responsive and beige-like anchor protein OS= <i>Homo sapiens</i> GN=LRBA PE=1 SV=4        | 2.0365                    | 0.000609 |
| Q13765     | Nascent polypeptide-associated complex subunit alpha OS= <i>Homo sapiens</i> GN=NACA PE=1 SV=1               | 2.029                     | 0.001067 |
| Q08J23     | tRNA (cytosine(34)-C(5))-methyltransferase OS= <i>Homo sapiens</i> GN=NSUN2 PE=1 SV=2                        | 2.0205                    | 0.008385 |
| O75223     | Gamma-glutamylcyclotransferase OS= <i>Homo sapiens</i> GN=GGCT PE=1 SV=1                                     | 2.006                     | 0.003327 |
| P20700     | Lamin-B1 OS= <i>Homo sapiens</i> GN=LIMNB1 PE=1 SV=2                                                         | 1.982                     | 6.8E-05  |
| P43487     | Ran-specific GTPase-activating protein OS= <i>Homo sapiens</i> GN=RANBP1 PE=1 SV=1                           | 1.9695                    | 0.007456 |
| P30050     | 60S ribosomal protein L12 OS= <i>Homo sapiens</i> GN=RPL12 PE=1 SV=1                                         | 1.961                     | 0.000103 |
| P08729     | Keratin, type II cytoskeletal 7 OS= <i>Homo sapiens</i> GN=KRT7 PE=1 SV=5                                    | 1.96                      | 3.5E-08  |
| P49585     | Choline-phosphate cytidyltransferase A OS= <i>Homo sapiens</i> GN=PCYT1A PE=1 SV=2                           | 1.949                     | 0.009506 |
| P15311     | Ezrin OS= <i>Homo sapiens</i> GN=EZR PE=1 SV=4                                                               | 1.937                     | 0.000112 |
| P19338     | Nucleolin OS= <i>Homo sapiens</i> GN=NCL PE=1 SV=3                                                           | 1.9285                    | 4.89E-05 |
| Q9NR99     | Matrix-remodeling-associated protein 5 OS= <i>Homo sapiens</i> GN=MXRA5 PE=2 SV=3                            | 1.9275                    | 0.004449 |
| Q8IUX7     | Adipocyte enhancer-binding protein 1 OS= <i>Homo sapiens</i> GN=AEBP1 PE=1 SV=1                              | 1.912                     | 0.004188 |
| Q15459     | Splicing factor 3A subunit 1 OS= <i>Homo sapiens</i> GN=SF3A1 PE=1 SV=1                                      | 1.911                     | 0.002117 |
| P38919     | Eukaryotic initiation factor 4A-III OS= <i>Homo sapiens</i> GN=EIF4A3 PE=1 SV=4                              | 1.91                      | 0.008213 |
| Q9UHB6     | LJM domain and actin-binding protein 1 OS= <i>Homo sapiens</i> GN=LJMA1 PE=1 SV=1                            | 1.9085                    | 0.001674 |
| P47813     | Eukaryotic translation initiation factor 1A, X-chromosomal OS= <i>Homo sapiens</i> GN=EIF1AX PE=1 SV=2       | 1.9045                    | 0.008956 |
| Q9NR45     | Sialic acid synthase OS= <i>Homo sapiens</i> GN=NANS PE=1 SV=2                                               | 1.9025                    | 5.07E-05 |
| Q14103     | Heterogeneous nuclear ribonucleoprotein D0 OS= <i>Homo sapiens</i> GN=HNRNPD PE=1 SV=1                       | 1.893                     | 0.002203 |
| P49207     | 60S ribosomal protein L34 OS= <i>Homo sapiens</i> GN=RPL34 PE=1 SV=3                                         | 1.887                     | 0.005138 |
| Q32P51     | Heterogeneous nuclear ribonucleoprotein A1-like 2 OS= <i>Homo sapiens</i> GN=HNRNPA1L2 PE=2 SV=2             | 1.885                     | 0.000146 |
| P24821     | Tenascin OS= <i>Homo sapiens</i> GN=TNC PE=1 SV=3                                                            | 1.874                     | 4.26E-06 |

Table SIII. Continued.

| Protein ID | Protein description                                                                                         | Ratio (cancer vs. normal) | P-value  |
|------------|-------------------------------------------------------------------------------------------------------------|---------------------------|----------|
| Q96G03     | Phosphoglucosyltransferase-2 OS= <i>Homo sapiens</i> GN=PGM2 PE=1 SV=4                                      | 1.8655                    | 0.000367 |
| P23246     | Splicing factor, proline- and glutamine-rich OS= <i>Homo sapiens</i> GN=SFPQ PE=1 SV=2                      | 1.865                     | 0.002261 |
| Q8IWE2     | Protein NOXP20 OS= <i>Homo sapiens</i> GN=FAM114A1 PE=1 SV=2                                                | 1.863                     | 0.001082 |
| P62249     | 40S ribosomal protein S16 OS= <i>Homo sapiens</i> GN=RPS16 PE=1 SV=2                                        | 1.858                     | 6.55E-05 |
| Q07955     | Serine/arginine-rich splicing factor 1 OS= <i>Homo sapiens</i> GN=SRSF1 PE=1 SV=2                           | 1.853                     | 0.002282 |
| Q99816     | Tumor susceptibility gene 101 protein OS= <i>Homo sapiens</i> GN=TSG101 PE=1 SV=2                           | 1.846                     | 0.009029 |
| Q00839     | Heterogeneous nuclear ribonucleoprotein U OS= <i>Homo sapiens</i> GN=HNRNPU PE=1 SV=6                       | 1.8445                    | 0.000159 |
| P13010     | X-ray repair cross-complementing protein 5 OS= <i>Homo sapiens</i> GN=XRCC5 PE=1 SV=3                       | 1.844                     | 3.97E-06 |
| Q9Y3I0     | tRNA-splicing ligase RtcB homolog OS= <i>Homo sapiens</i> GN=RTCB PE=1 SV=1                                 | 1.844                     | 7.55E-06 |
| P49591     | Serine--tRNA ligase, cytoplasmic OS= <i>Homo sapiens</i> GN=SARS PE=1 SV=3                                  | 1.84                      | 0.006389 |
| Q9H3P7     | Golgi resident protein GCP60 OS= <i>Homo sapiens</i> GN=ACBD3 PE=1 SV=4                                     | 1.836                     | 0.000973 |
| Q8N1S5     | Zinc transporter ZIP11 OS= <i>Homo sapiens</i> GN=SLC39A11 PE=2 SV=3                                        | 1.835                     | 0.007755 |
| Q9HCC0     | Methylcrotonoyl-CoA carboxylase beta chain, mitochondrial OS= <i>Homo sapiens</i> GN=MC22 PE=1 SV=1         | 1.834                     | 0.000145 |
| Q06210     | Glutamine--fructose-6-phosphate aminotransferase [isomerizing] 1 OS= <i>Homo sapiens</i> GN=GFPT1 PE=1 SV=3 | 1.832                     | 6.28E-05 |
| P62241     | 40S ribosomal protein S8 OS= <i>Homo sapiens</i> GN=RPS8 PE=1 SV=2                                          | 1.82                      | 0.003301 |
| P53621     | Coatamer subunit alpha OS= <i>Homo sapiens</i> GN=COXA PE=1 SV=2                                            | 1.819                     | 3.57E-08 |
| Q96DI7     | U5 small nuclear ribonucleoprotein 40 kDa protein OS= <i>Homo sapiens</i> GN=SNRNP40 PE=1 SV=1              | 1.806                     | 0.001541 |
| P18077     | 60S ribosomal protein L35a OS= <i>Homo sapiens</i> GN=RPL35A PE=1 SV=2                                      | 1.797                     | 0.007925 |
| P49321     | Nuclear autoantigenic sperm protein OS= <i>Homo sapiens</i> GN=NASP PE=1 SV=2                               | 1.795                     | 0.006417 |
| P61604     | 10 kDa heat shock protein, mitochondrial OS= <i>Homo sapiens</i> GN=HSPE1 PE=1 SV=2                         | 1.795                     | 0.000664 |
| Q15437     | Protein transport protein Sec23B OS= <i>Homo sapiens</i> GN=SEC23B PE=1 SV=2                                | 1.795                     | 0.002945 |
| P09874     | Poly [ADP-ribose] polymerase 1 OS= <i>Homo sapiens</i> GN=PARP1 PE=1 SV=4                                   | 1.7915                    | 0.007477 |
| O14979     | Heterogeneous nuclear ribonucleoprotein D-like OS= <i>Homo sapiens</i> GN=HNRNPDL PE=1 SV=3                 | 1.789                     | 0.006895 |
| Q9UBE0     | SUMO-activating enzyme subunit 1 OS= <i>Homo sapiens</i> GN=SAE1 PE=1 SV=1                                  | 1.788                     | 0.000538 |
| Q9NY33     | Dipeptidyl peptidase 3 OS= <i>Homo sapiens</i> GN=DPP3 PE=1 SV=2                                            | 1.774                     | 0.000323 |
| P18031     | Tyrosine-protein phosphatase non-receptor type 1 OS= <i>Homo sapiens</i> GN=PTPN1 PE=1 SV=1                 | 1.768                     | 0.001796 |
| P43243     | Matrin-3 OS= <i>Homo sapiens</i> GN=MATR3 PE=1 SV=2                                                         | 1.765                     | 0.001315 |
| Q86VP6     | Cullin-associated NEDD8-dissociated protein 1 OS= <i>Homo sapiens</i> GN=CAND1 PE=1 SV=2                    | 1.764                     | 2.34E-10 |
| Q7Z7H5     | Transmembrane emp24 domain-containing protein 4 OS= <i>Homo sapiens</i> GN=TMED4 PE=1 SV=1                  | 1.752                     | 0.009125 |
| O43583     | Density-regulated protein OS= <i>Homo sapiens</i> GN=DENR PE=1 SV=2                                         | 1.7465                    | 0.006164 |
| P61081     | NEDD8-conjugating enzyme Ubc12 OS= <i>Homo sapiens</i> GN=UBE2M PE=1 SV=1                                   | 1.743                     | 0.0036   |
| P78527     | DNA-dependent protein kinase catalytic subunit OS= <i>Homo sapiens</i> GN=PRKDC PE=1 SV=3                   | 1.733                     | 1.09E-10 |
| P12956     | X-ray repair cross-complementing protein 6 OS= <i>Homo sapiens</i> GN=XRCC6 PE=1 SV=2                       | 1.7255                    | 6E-06    |
| O94760     | N(G),N(G)-dimethylarginine dimethylaminohydrolase 1 OS= <i>Homo sapiens</i> GN=DDAH1 PE=1 SV=3              | 1.721                     | 0.000901 |
| Q9Y6E2     | Basic leucine zipper and W2 domain-containing protein 2 OS= <i>Homo sapiens</i> GN=BZW2 PE=1 SV=1           | 1.7205                    | 0.00566  |
| Q7L014     | Probable ATP-dependent RNA helicase DDX46 OS= <i>Homo sapiens</i> GN=DDX46 PE=1 SV=2                        | 1.718                     | 0.00122  |
| P46777     | 60S ribosomal protein L5 OS= <i>Homo sapiens</i> GN=RPL5 PE=1 SV=3                                          | 1.714                     | 0.005829 |
| Q96A35     | 39S ribosomal protein L24, mitochondrial OS= <i>Homo sapiens</i> GN=MRPL24 PE=1 SV=1                        | 1.7105                    | 0.004032 |

Table SIII. Continued.

| Protein ID | Protein description                                                                                     | Ratio (cancer vs. normal) | P-value  |
|------------|---------------------------------------------------------------------------------------------------------|---------------------------|----------|
| P22307     | Non-specific lipid-transfer protein OS= <i>Homo sapiens</i> GN=SCP2 PE=1 SV=2                           | 1.71                      | 0.005982 |
| P14678     | Small nuclear ribonucleoprotein-associated proteins B and B~ OS= <i>Homo sapiens</i> GN=SNRPB PE=1 SV=2 | 1.709                     | 0.003967 |
| Q06830     | Peroxiredoxin-1 OS= <i>Homo sapiens</i> GN=PRDX1 PE=1 SV=1                                              | 1.708                     | 5.46E-08 |
| O76094     | Signal recognition particle subunit SRP72 OS= <i>Homo sapiens</i> GN=SRP72 PE=1 SV=3                    | 1.706                     | 0.000613 |
| P29372     | DNA-3-methyladenine glycosylase OS= <i>Homo sapiens</i> GN=MPG PE=1 SV=3                                | 1.7045                    | 0.009488 |
| Q9BZK7     | F-box-like/WD repeat-containing protein TBL1XR1 OS= <i>Homo sapiens</i> GN=TBL1XR1 PE=1 SV=1            | 1.704                     | 0.003795 |
| Q02818     | Nucleobindin-1 OS= <i>Homo sapiens</i> GN=NUCB1 PE=1 SV=4                                               | 1.695                     | 0.000262 |
| Q04637     | Eukaryotic translation initiation factor 4 gamma 1 OS= <i>Homo sapiens</i> GN=EIF4G1 PE=1 SV=4          | 1.6945                    | 0.000316 |
| P26641     | Elongation factor 1-gamma OS= <i>Homo sapiens</i> GN=EEF1G PE=1 SV=3                                    | 1.6905                    | 0.001651 |
| Q9NZB2     | Constitutive coactivator of PPAR-gamma-like protein 1 OS= <i>Homo sapiens</i> GN=FAM120A PE=1 SV=2      | 1.69                      | 2.25E-05 |
| Q14192     | Four and a half LIM domains protein 2 OS= <i>Homo sapiens</i> GN=FHL2 PE=1 SV=3                         | 1.687                     | 0.007932 |
| P02786     | Transferrin receptor protein 1 OS= <i>Homo sapiens</i> GN=TFRC PE=1 SV=2                                | 1.684                     | 0.002904 |
| P07910     | Heterogeneous nuclear ribonucleoproteins C1/C2 OS= <i>Homo sapiens</i> GN=HNRNPC PE=1 SV=4              | 1.677                     | 0.004032 |
| P49915     | GMP synthase [glutamine-hydrolyzing] OS= <i>Homo sapiens</i> GN=GMPS PE=1 SV=1                          | 1.671                     | 0.000175 |
| Q00341     | Vigilin OS= <i>Homo sapiens</i> GN=HDLBP PE=1 SV=2                                                      | 1.665                     | 1.07E-05 |
| Q10471     | Polypeptide N-acetylgalactosaminyltransferase 2 OS= <i>Homo sapiens</i> GN=GALNT2 PE=1 SV=1             | 1.665                     | 0.008749 |
| P27694     | Replication protein A 70 kDa DNA-binding subunit OS= <i>Homo sapiens</i> GN=RPA1 PE=1 SV=2              | 1.664                     | 0.005447 |
| Q9NR12     | PDZ and LIM domain protein 7 OS= <i>Homo sapiens</i> GN=PDLIM7 PE=1 SV=1                                | 1.664                     | 0.003813 |
| Q13263     | Transcription intermediary factor 1-beta OS= <i>Homo sapiens</i> GN=TRIM28 PE=1 SV=5                    | 1.661                     | 0.000231 |
| Q6P2Q9     | Pre-mRNA-processing-splicing factor 8 OS= <i>Homo sapiens</i> GN=PRPF8 PE=1 SV=2                        | 1.656                     | 0.000792 |
| P13637     | Sodium/potassium-transporting ATPase subunit alpha-3 OS= <i>Homo sapiens</i> GN=ATP1A3 PE=1 SV=3        | 1.6545                    | 0.003404 |
| Q1KMD3     | Heterogeneous nuclear ribonucleoprotein U-like protein 2 OS= <i>Homo sapiens</i> GN=HNRNPUL2 PE=1 SV=1  | 1.653                     | 6.92E-08 |
| Q99961     | Endophilin-A2 OS= <i>Homo sapiens</i> GN=SH3GL1 PE=1 SV=1                                               | 1.6525                    | 0.000942 |
| O14976     | Cyclin-G-associated kinase OS= <i>Homo sapiens</i> GN=GAK PE=1 SV=2                                     | 1.651                     | 0.006435 |
| P22102     | Trifunctional purine biosynthetic protein adenosine-3 OS= <i>Homo sapiens</i> GN=GART PE=1 SV=1         | 1.646                     | 0.001881 |
| P61978     | Heterogeneous nuclear ribonucleoprotein K OS= <i>Homo sapiens</i> GN=HNRNPK PE=1 SV=1                   | 1.643                     | 0.00023  |
| O00571     | ATP-dependent RNA helicase DDX3X OS= <i>Homo sapiens</i> GN=DDX3X PE=1 SV=3                             | 1.639                     | 0.000361 |
| P06748     | Nucleophosmin OS= <i>Homo sapiens</i> GN=NPM1 PE=1 SV=2                                                 | 1.637                     | 0.005875 |
| Q03154     | Aminoacylase-1 OS= <i>Homo sapiens</i> GN=ACY1 PE=1 SV=1                                                | 1.636                     | 0.000373 |
| P13639     | Elongation factor 2 OS= <i>Homo sapiens</i> GN=EEF2 PE=1 SV=4                                           | 1.6355                    | 7.16E-15 |
| P31948     | Stress-induced-phosphoprotein 1 OS= <i>Homo sapiens</i> GN=STIP1 PE=1 SV=1                              | 1.633                     | 3.68E-10 |
| O15269     | Serine palmitoyltransferase 1 OS= <i>Homo sapiens</i> GN=SPTLC1 PE=1 SV=1                               | 1.632                     | 0.008343 |
| P22059     | Oxysterol-binding protein 1 OS= <i>Homo sapiens</i> GN=OSBP PE=1 SV=1                                   | 1.6315                    | 0.001194 |
| P51884     | Lumican OS= <i>Homo sapiens</i> GN=LUM PE=1 SV=2                                                        | 1.6295                    | 6.54E-13 |
| P49959     | Double-strand break repair protein MRE11A OS= <i>Homo sapiens</i> GN=MRE11A PE=1 SV=3                   | 1.629                     | 0.000368 |
| Q9P2J5     | Leucine--tRNA ligase, cytoplasmic OS= <i>Homo sapiens</i> GN=LARS PE=1 SV=2                             | 1.629                     | 0.003611 |
| P07686     | Beta-hexosaminidase subunit beta OS= <i>Homo sapiens</i> GN=HEXB PE=1 SV=3                              | 1.6235                    | 0.00036  |
| Q92945     | Far upstream element-binding protein 2 OS= <i>Homo sapiens</i> GN=KHSRP PE=1 SV=4                       | 1.6195                    | 0.00836  |



Table SIII. Continued.

| Protein ID | Protein description                                                                                                                        | Ratio (cancer vs. normal) | P-value  |
|------------|--------------------------------------------------------------------------------------------------------------------------------------------|---------------------------|----------|
| Q92598     | Heat shock protein 105 kDa OS= <i>Homo sapiens</i> GN=HSPH1 PE=1 SV=1                                                                      | 1.618                     | 0.002145 |
| O75643     | U5 small nuclear ribonucleoprotein 200 kDa helicase OS= <i>Homo sapiens</i> GN=SNRNP200 PE=1 SV=2                                          | 1.6155                    | 9.88E-06 |
| Q9NZU5     | LIM and cysteine-rich domains protein 1 OS= <i>Homo sapiens</i> GN=LIMCD1 PE=1 SV=1                                                        | 1.613                     | 0.00555  |
| O75821     | Eukaryotic translation initiation factor 3 subunit G OS= <i>Homo sapiens</i> GN=EIF3G PE=1 SV=2                                            | 1.6125                    | 0.003627 |
| Q92896     | Golgi apparatus protein 1 OS= <i>Homo sapiens</i> GN=GLG1 PE=1 SV=2                                                                        | 1.6125                    | 8.79E-05 |
| P37802     | Transgelin-2 OS= <i>Homo sapiens</i> GN=TAGLN2 PE=1 SV=3                                                                                   | 1.61                      | 4.79E-05 |
| Q07065     | Cytoskeleton-associated protein 4 OS= <i>Homo sapiens</i> GN=CKAP4 PE=1 SV=2                                                               | 1.6095                    | 5.18E-06 |
| P07108     | Acyl-CoA-binding protein OS= <i>Homo sapiens</i> GN=DBI PE=1 SV=2                                                                          | 1.6085                    | 0.002783 |
| Q92878     | DNA repair protein RAD50 OS= <i>Homo sapiens</i> GN=RAD50 PE=1 SV=1                                                                        | 1.606                     | 1.08E-07 |
| O94906     | Pre-mRNA-processing factor 6 OS= <i>Homo sapiens</i> GN=PRPF6 PE=1 SV=1                                                                    | 1.6055                    | 0.002135 |
| O60264     | SWI/SNF-related matrix-associated actin-dependent regulator of chromatin subfamily A member 5 OS= <i>Homo sapiens</i> GN=SMARCA5 PE=1 SV=1 | 1.601                     | 0.000291 |
| P18085     | ADP-ribosylation factor 4 OS= <i>Homo sapiens</i> GN=ARF4 PE=1 SV=3                                                                        | 1.601                     | 0.007549 |
| Q9NZM1     | Myoferlin OS= <i>Homo sapiens</i> GN=MYOF PE=1 SV=1                                                                                        | 1.6005                    | 1.12E-11 |
| P55265     | Double-stranded RNA-specific adenosine deaminase OS= <i>Homo sapiens</i> GN=ADAR PE=1 SV=4                                                 | 1.6                       | 0.002871 |
| P26639     | Threonine--rRNA ligase, cytoplasmic OS= <i>Homo sapiens</i> GN=TARS PE=1 SV=3                                                              | 1.598                     | 0.002426 |
| Q15029     | 116 kDa U5 small nuclear ribonucleoprotein component OS= <i>Homo sapiens</i> GN=EFTUD2 PE=1 SV=1                                           | 1.596                     | 9.65E-05 |
| P48735     | Isocitrate dehydrogenase [NADP], mitochondrial OS= <i>Homo sapiens</i> GN=IDH2 PE=1 SV=2                                                   | 1.594                     | 8.24E-07 |
| P52566     | Rho GDP-dissociation inhibitor 2 OS= <i>Homo sapiens</i> GN=ARHGDI2 PE=1 SV=3                                                              | 1.5915                    | 0.005657 |
| Q00796     | Sorbitol dehydrogenase OS= <i>Homo sapiens</i> GN=SORD PE=1 SV=4                                                                           | 1.59                      | 0.005068 |
| P68032     | Actin, alpha cardiac muscle 1 OS= <i>Homo sapiens</i> GN=ACTC1 PE=1 SV=1                                                                   | 1.588                     | 8.76E-07 |
| P31942     | Heterogeneous nuclear ribonucleoprotein H3 OS= <i>Homo sapiens</i> GN=HNRNPH3 PE=1 SV=2                                                    | 1.587                     | 0.000225 |
| P62805     | Histone H4 OS= <i>Homo sapiens</i> GN=HIST1H4A PE=1 SV=2                                                                                   | 1.581                     | 1.62E-08 |
| Q9NUU7     | ATP-dependent RNA helicase DDX19A OS= <i>Homo sapiens</i> GN=DDX19A PE=1 SV=1                                                              | 1.577                     | 0.003185 |
| Q96HC4     | PDZ and LIM domain protein 5 OS= <i>Homo sapiens</i> GN=PDLIM5 PE=1 SV=5                                                                   | 1.5745                    | 0.003093 |
| P18583     | Protein SON OS= <i>Homo sapiens</i> GN=SON PE=1 SV=4                                                                                       | 1.571                     | 0.006112 |
| Q5VTE0     | Putative elongation factor 1-alpha-like 3 OS= <i>Homo sapiens</i> GN=EEF1A1P5 PE=5 SV=1                                                    | 1.571                     | 0.000188 |
| P30044     | Peroxioredoxin-5, mitochondrial OS= <i>Homo sapiens</i> GN=PRDX5 PE=1 SV=4                                                                 | 1.568                     | 0.00136  |
| P08107     | Heat shock 70 kDa protein 1A/1B OS= <i>Homo sapiens</i> GN=HSPA1A PE=1 SV=5                                                                | 1.566                     | 2.83E-06 |
| P52306     | Rap1 GTPase-GDP dissociation stimulator 1 OS= <i>Homo sapiens</i> GN=RAP1GDS1 PE=1 SV=3                                                    | 1.564                     | 0.008914 |
| Q71UM5     | 40S ribosomal protein S27-like OS= <i>Homo sapiens</i> GN=RPS27L PE=1 SV=3                                                                 | 1.5635                    | 0.002824 |
| P62826     | GTP-binding nuclear protein Ran OS= <i>Homo sapiens</i> GN=RAN PE=1 SV=3                                                                   | 1.5605                    | 0.003168 |
| P61247     | 40S ribosomal protein S3a OS= <i>Homo sapiens</i> GN=RPS3A PE=1 SV=2                                                                       | 1.5585                    | 0.002946 |
| Q15833     | Syntaxin-binding protein 2 OS= <i>Homo sapiens</i> GN=STXB2 PE=1 SV=2                                                                      | 1.558                     | 0.005127 |
| P30519     | Heme oxygenase 2 OS= <i>Homo sapiens</i> GN=HMOX2 PE=1 SV=2                                                                                | 1.557                     | 0.001182 |
| Q9H107     | UPF0160 protein MYG1, mitochondrial OS= <i>Homo sapiens</i> GN=C12orf10 PE=1 SV=2                                                          | 1.553                     | 0.00384  |
| P14866     | Heterogeneous nuclear ribonucleoprotein L OS= <i>Homo sapiens</i> GN=HNRNPL PE=1 SV=2                                                      | 1.5525                    | 0.001427 |
| Q7L2E3     | Putative ATP-dependent RNA helicase DHX30 OS= <i>Homo sapiens</i> GN=DHX30 PE=1 SV=1                                                       | 1.552                     | 0.001734 |

Table SIII. Continued.

| Protein ID | Protein description                                                                           | Ratio (cancer vs. normal) | P-value  |
|------------|-----------------------------------------------------------------------------------------------|---------------------------|----------|
| P48444     | Coatmer subunit delta OS= <i>Homo sapiens</i> GN=ARCN1 PE=1 SV=1                              | 1.5485                    | 0.000167 |
| P19012     | Keratin, type I cytoskeletal 15 OS= <i>Homo sapiens</i> GN=KRT15 PE=1 SV=3                    | 1.548                     | 0.003923 |
| Q14847     | LIM and SH3 domain protein 1 OS= <i>Homo sapiens</i> GN=LASP1 PE=1 SV=2                       | 1.5415                    | 0.008203 |
| P40763     | Signal transducer and activator of transcription 3 OS= <i>Homo sapiens</i> GN=STAT3 PE=1 SV=2 | 1.537                     | 0.000895 |
| A0AVT1     | Ubiquitin-like modifier-activating enzyme 6 OS= <i>Homo sapiens</i> GN=UBA6 PE=1 SV=1         | 1.5345                    | 0.000467 |
| P04792     | Heat shock protein beta-1 OS= <i>Homo sapiens</i> GN=HSPB1 PE=1 SV=2                          | 1.534                     | 7.78E-05 |
| P52565     | Rho GDP-dissociation inhibitor 1 OS= <i>Homo sapiens</i> GN=ARHGDI1 PE=1 SV=3                 | 1.525                     | 0.002866 |
| P12814     | Alpha-actinin-1 OS= <i>Homo sapiens</i> GN=ACTN1 PE=1 SV=2                                    | 1.522                     | 2.46E-10 |
| O75937     | DnaJ homolog subfamily C member 8 OS= <i>Homo sapiens</i> GN=DNAJC8 PE=1 SV=2                 | 1.519                     | 0.001697 |
| P08123     | Collagen alpha-2(I) chain OS= <i>Homo sapiens</i> GN=COL1A2 PE=1 SV=7                         | 1.515                     | 6.11E-10 |
| Q15185     | Prostaglandin E synthase 3 OS= <i>Homo sapiens</i> GN=PTGES3 PE=1 SV=1                        | 1.5115                    | 0.000382 |
| Q13177     | Serine/threonine-protein kinase PAK 2 OS= <i>Homo sapiens</i> GN=PAK2 PE=1 SV=3               | 1.5095                    | 0.009002 |
| Q15113     | Procollagen C-endopeptidase enhancer 1 OS= <i>Homo sapiens</i> GN=PCOLCE PE=1 SV=2            | 1.509                     | 0.00308  |
| P11142     | Heat shock cognate 71 kDa protein OS= <i>Homo sapiens</i> GN=HSPA8 PE=1 SV=1                  | 1.5085                    | 2.5E-13  |
| Q14980     | Nuclear mitotic apparatus protein 1 OS= <i>Homo sapiens</i> GN=NUMA1 PE=1 SV=2                | 1.5065                    | 3.59E-05 |
| O60763     | General vesicular transport factor p115 OS= <i>Homo sapiens</i> GN=USO1 PE=1 SV=2             | 1.506                     | 3.32E-05 |
| O75083     | WD repeat-containing protein 1 OS= <i>Homo sapiens</i> GN=WDR1 PE=1 SV=4                      | 1.5025                    | 0.001385 |
| Q9Y3C6     | Peptidyl-prolyl cis-trans isomerase-like 1 OS= <i>Homo sapiens</i> GN=PPIL1 PE=1 SV=1         | 1.502                     | 0.001209 |

Table SIV. All proteins whose expression level were significantly downregulated in breast cancer tissues (fold change  $\leq 1/1.5$  compared with normal tissues).

| Protein ID | Protein description                                                                                                | Ratio (cancer vs. normal) | P-value  |
|------------|--------------------------------------------------------------------------------------------------------------------|---------------------------|----------|
| Q96FV2     | Secernin-2 OS= <i>Homo sapiens</i> GN=SCRN2 PE=1 SV=3                                                              | 0.666                     | 0.001084 |
| P30041     | Peroxiredoxin-6 OS= <i>Homo sapiens</i> GN=PRDX6 PE=1 SV=3                                                         | 0.665                     | 1.29E-09 |
| Q9BX97     | Plasmalemma vesicle-associated protein OS= <i>Homo sapiens</i> GN=PLVAP PE=2 SV=1                                  | 0.665                     | 0.006584 |
| P10643     | Complement component C7 OS= <i>Homo sapiens</i> GN=C7 PE=1 SV=2                                                    | 0.6645                    | 0.001107 |
| P51648     | Fatty aldehyde dehydrogenase OS= <i>Homo sapiens</i> GN=ALDH3A2 PE=1 SV=1                                          | 0.664                     | 0.000786 |
| P11498     | Pyruvate carboxylase, mitochondrial OS= <i>Homo sapiens</i> GN=PC PE=1 SV=2                                        | 0.663                     | 8.92E-06 |
| P01031     | Complement C5 OS= <i>Homo sapiens</i> GN=C5 PE=1 SV=4                                                              | 0.662                     | 2.81E-07 |
| P05556     | Integrin beta-1 OS= <i>Homo sapiens</i> GN=ITGB1 PE=1 SV=2                                                         | 0.6605                    | 1.89E-06 |
| P07099     | Epoxide hydrolase 1 OS= <i>Homo sapiens</i> GN=EPHX1 PE=1 SV=1                                                     | 0.6585                    | 4.9E-06  |
| P43652     | Afamin OS= <i>Homo sapiens</i> GN=AFM PE=1 SV=1                                                                    | 0.658                     | 8.22E-10 |
| P01024     | Complement C3 OS= <i>Homo sapiens</i> GN=C3 PE=1 SV=2                                                              | 0.656                     | 1.66E-52 |
| P08294     | Extracellular superoxide dismutase [Cu-Zn] OS= <i>Homo sapiens</i> GN=SOD3 PE=1 SV=2                               | 0.653                     | 0.000636 |
| P02774     | Vitamin D-binding protein OS= <i>Homo sapiens</i> GN=GC PE=1 SV=1                                                  | 0.649                     | 1.78E-19 |
| O43491     | Band 4.1-like protein 2 OS= <i>Homo sapiens</i> GN=EPB41L2 PE=1 SV=1                                               | 0.648                     | 3.43E-05 |
| P16930     | Fumarylacetoacetase OS= <i>Homo sapiens</i> GN=FAH PE=1 SV=2                                                       | 0.647                     | 1.5E-08  |
| P21399     | Cytoplasmic aconitate hydratase OS= <i>Homo sapiens</i> GN=ACO1 PE=1 SV=3                                          | 0.645                     | 6.23E-07 |
| P30038     | Delta-1-pyrroline-5-carboxylate dehydrogenase, mitochondrial OS= <i>Homo sapiens</i> GN=ALDH4A1 PE=1 SV=3          | 0.643                     | 1.11E-09 |
| B9A064     | Immunoglobulin lambda-like polypeptide 5 OS= <i>Homo sapiens</i> GN=IGLL5 PE=2 SV=2                                | 0.6425                    | 4.63E-10 |
| Q13418     | Integrin-linked protein kinase OS= <i>Homo sapiens</i> GN=ILK PE=1 SV=2                                            | 0.6425                    | 1.9E-10  |
| O43175     | D-3-phosphoglycerate dehydrogenase OS= <i>Homo sapiens</i> GN=PHGDH PE=1 SV=4                                      | 0.642                     | 2.11E-05 |
| P05546     | Heparin cofactor 2 OS= <i>Homo sapiens</i> GN=SERPIND1 PE=1 SV=3                                                   | 0.642                     | 6.94E-07 |
| P01859     | Ig gamma-2 chain C region OS= <i>Homo sapiens</i> GN=IGHG2 PE=1 SV=2                                               | 0.6415                    | 1.39E-17 |
| P08758     | Annexin A5 OS= <i>Homo sapiens</i> GN=ANXA5 PE=1 SV=2                                                              | 0.6405                    | 1.57E-19 |
| P02765     | Alpha-2-HS-glycoprotein OS= <i>Homo sapiens</i> GN=AHSG PE=1 SV=1                                                  | 0.6395                    | 4.78E-06 |
| P80748     | Ig lambda chain V-III region LOI OS= <i>Homo sapiens</i> PE=1 SV=1                                                 | 0.638                     | 0.003355 |
| Q81WA5     | Choline transporter-like protein 2 OS= <i>Homo sapiens</i> GN=SLC44A2 PE=1 SV=3                                    | 0.6375                    | 0.000756 |
| Q16134     | Electron transfer flavoprotein-ubiquinone oxidoreductase, mitochondrial OS= <i>Homo sapiens</i> GN=ETFDH PE=1 SV=2 | 0.634                     | 1.98E-05 |
| Q6YN16     | Hydroxysteroid dehydrogenase-like protein 2 OS= <i>Homo sapiens</i> GN=HSDL2 PE=1 SV=1                             | 0.633                     | 4.73E-06 |
| Q81V08     | Phospholipase D3 OS= <i>Homo sapiens</i> GN=PLD3 PE=1 SV=1                                                         | 0.6305                    | 0.007753 |
| P08670     | Vimentin OS= <i>Homo sapiens</i> GN=VIM PE=1 SV=4                                                                  | 0.6295                    | 4.82E-30 |
| Q15124     | Phosphoglucosyltransferase-like protein 5 OS= <i>Homo sapiens</i> GN=PGM5 PE=1 SV=2                                | 0.629                     | 7.02E-06 |
| P01615     | Ig kappa chain V-II region TEW OS= <i>Homo sapiens</i> PE=1 SV=1                                                   | 0.628                     | 6.91E-06 |
| P30043     | Flavin reductase (NADPH) OS= <i>Homo sapiens</i> GN=BLVRB PE=1 SV=3                                                | 0.628                     | 0.000447 |
| P48059     | LJM and senescent cell antigen-like-containing domain protein 1 OS= <i>Homo sapiens</i> GN=LJMS1 PE=1 SV=4         | 0.628                     | 0.000175 |
| Q9P2R7     | Succinyl-CoA ligase [ADP-forming] subunit beta, mitochondrial OS= <i>Homo sapiens</i> GN=SUCLA2 PE=1 SV=3          | 0.627                     | 0.00109  |
| P02790     | Hemopexin OS= <i>Homo sapiens</i> GN=HPX PE=1 SV=2                                                                 | 0.6255                    | 4.59E-14 |
| Q15404     | Ras suppressor protein 1 OS= <i>Homo sapiens</i> GN=RSU1 PE=1 SV=3                                                 | 0.624                     | 2.99E-05 |
| P12429     | Annexin A3 OS= <i>Homo sapiens</i> GN=ANXA3 PE=1 SV=3                                                              | 0.6235                    | 3.05E-11 |

Table SIV. Continued.

| Protein ID | Protein description                                                                    | Ratio (cancer vs. normal) | P-value  |
|------------|----------------------------------------------------------------------------------------|---------------------------|----------|
| P13671     | Complement component C6 OS= <i>Homo sapiens</i> GN=C6 PE=1 SV=3                        | 0.622                     | 1.56E-07 |
| Q12797     | Aspartyl/asparaginyl beta-hydroxylase OS= <i>Homo sapiens</i> GN=ASPH PE=1 SV=3        | 0.621                     | 1.5E-07  |
| P07355     | Annexin A2 OS= <i>Homo sapiens</i> GN=ANXA2 PE=1 SV=2                                  | 0.6195                    | 4.3E-15  |
| P04003     | C4b-binding protein alpha chain OS= <i>Homo sapiens</i> GN=C4BPA PE=1 SV=2             | 0.619                     | 1.4E-16  |
| Q02952     | A-kinase anchor protein 12 OS= <i>Homo sapiens</i> GN=AKAP12 PE=1 SV=4                 | 0.618                     | 1.6E-05  |
| P01602     | Ig kappa chain V-1 region EU OS= <i>Homo sapiens</i> PE=1 SV=1                         | 0.6095                    | 0.000199 |
| O43866     | CD5 antigen-like OS= <i>Homo sapiens</i> GN=CD5L PE=1 SV=1                             | 0.6085                    | 1.72E-05 |
| P60903     | Protein S100-A10 OS= <i>Homo sapiens</i> GN=S100A10 PE=1 SV=2                          | 0.608                     | 1.87E-08 |
| P61981     | 14-3-3 protein gamma OS= <i>Homo sapiens</i> GN=YWHAG PE=1 SV=2                        | 0.6075                    | 5.05E-10 |
| P05452     | Tetranectin OS= <i>Homo sapiens</i> GN=CLEC3B PE=1 SV=3                                | 0.6015                    | 0.009635 |
| P01767     | Ig heavy chain V-III region BUT OS= <i>Homo sapiens</i> PE=1 SV=1                      | 0.6                       | 0.000617 |
| Q14624     | Inter-alpha-trypsin inhibitor heavy chain H4 OS= <i>Homo sapiens</i> GN=ITI4 PE=1 SV=4 | 0.599                     | 1.14E-10 |
| O15247     | Chloride intracellular channel protein 2 OS= <i>Homo sapiens</i> GN=CLIC2 PE=1 SV=3    | 0.597                     | 0.004253 |
| P01764     | Ig heavy chain V-III region TIL OS= <i>Homo sapiens</i> PE=1 SV=1                      | 0.594                     | 2.76E-05 |
| P00488     | Coagulation factor XIII A chain OS= <i>Homo sapiens</i> GN=F13A1 PE=1 SV=4             | 0.593                     | 8.16E-10 |
| P02656     | Apolipoprotein C-III OS= <i>Homo sapiens</i> GN=APOC3 PE=1 SV=1                        | 0.593                     | 0.005001 |
| Q86TX2     | Acyl-coenzyme A thioesterase 1 OS= <i>Homo sapiens</i> GN=ACOT1 PE=1 SV=1              | 0.593                     | 0.001438 |
| P01019     | Angiotensinogen OS= <i>Homo sapiens</i> GN=AGT PE=1 SV=1                               | 0.591                     | 0.000114 |
| P09972     | Fructose-bisphosphate aldolase C OS= <i>Homo sapiens</i> GN=ALDOC PE=1 SV=2            | 0.588                     | 0.005795 |
| P21589     | 5'-nucleotidase OS= <i>Homo sapiens</i> GN=NT5E PE=1 SV=1                              | 0.586                     | 0.007598 |
| P56199     | Integrin alpha-1 OS= <i>Homo sapiens</i> GN=ITGA1 PE=1 SV=2                            | 0.5855                    | 0.001597 |
| P01009     | Alpha-1-antitrypsin OS= <i>Homo sapiens</i> GN=SERPINA1 PE=1 SV=3                      | 0.584                     | 8.1E-131 |
| P32119     | Peroxiredoxin-2 OS= <i>Homo sapiens</i> GN=PRDX2 PE=1 SV=5                             | 0.5835                    | 3.3E-12  |
| P27338     | Amine oxidase [flavin-containing] B OS= <i>Homo sapiens</i> GN=MAOB PE=1 SV=3          | 0.582                     | 9.63E-05 |
| P02775     | Platelet basic protein OS= <i>Homo sapiens</i> GN=PPBP PE=1 SV=3                       | 0.58                      | 0.00072  |
| P27169     | Serum paraoxonase/arylesterase 1 OS= <i>Homo sapiens</i> GN=PONI PE=1 SV=3             | 0.5795                    | 6.91E-05 |
| P01834     | Ig kappa chain C region OS= <i>Homo sapiens</i> GN=IGKC PE=1 SV=1                      | 0.579                     | 5.45E-35 |
| Q13813     | Spectrin alpha chain, non-erythrocytic 1 OS= <i>Homo sapiens</i> GN=SPTAN1 PE=1 SV=3   | 0.578                     | 1.53E-48 |
| P01619     | Ig kappa chain V-III region WOL OS= <i>Homo sapiens</i> PE=1 SV=1                      | 0.577                     | 0.002903 |
| P27144     | Adenylate kinase 4, mitochondrial OS= <i>Homo sapiens</i> GN=AK4 PE=1 SV=1             | 0.5765                    | 0.005733 |
| P01876     | Ig alpha-1 chain C region OS= <i>Homo sapiens</i> GN=IGHA1 PE=1 SV=2                   | 0.575                     | 4.78E-14 |
| P04264     | Keratin, type II cytoskeletal 1 OS= <i>Homo sapiens</i> GN=KRT1 PE=1 SV=6              | 0.575                     | 8.93E-05 |
| P04114     | Apolipoprotein B-100 OS= <i>Homo sapiens</i> GN=APOB PE=1 SV=2                         | 0.573                     | 3.43E-39 |
| Q9HBL0     | Tensin-1 OS= <i>Homo sapiens</i> GN=TNS1 PE=1 SV=2                                     | 0.572                     | 1.91E-07 |
| P12277     | Creatine kinase B-type OS= <i>Homo sapiens</i> GN=CKB PE=1 SV=1                        | 0.568                     | 4.28E-09 |
| P02768     | Serum albumin OS= <i>Homo sapiens</i> GN=ALB PE=1 SV=2                                 | 0.567                     | 0        |
| P00450     | Ceruloplasmin OS= <i>Homo sapiens</i> GN=CP PE=1 SV=1                                  | 0.565                     | 7.44E-18 |
| P10301     | Ras-related protein R-Ras OS= <i>Homo sapiens</i> GN=RRAS PE=1 SV=1                    | 0.565                     | 0.0018   |

Table SIV. Continued.

| Protein ID | Protein description                                                                                             | Ratio (cancer vs. normal) | P-value  |
|------------|-----------------------------------------------------------------------------------------------------------------|---------------------------|----------|
| P42765     | 3-ketoacyl-CoA thiolase, mitochondrial OS= <i>Homo sapiens</i> GN=ACAA2 PE=1 SV=2                               | 0.563                     | 5.09E-07 |
| P35555     | Fibrillin-1 OS= <i>Homo sapiens</i> GN=FBN1 PE=1 SV=3                                                           | 0.56                      | 8.91E-34 |
| P01871     | Ig mu chain C region OS= <i>Homo sapiens</i> GN=IGHM PE=1 SV=3                                                  | 0.559                     | 2.06E-05 |
| P02794     | Ferritin heavy chain OS= <i>Homo sapiens</i> GN=FTH1 PE=1 SV=2                                                  | 0.5585                    | 0.000236 |
| P24043     | Laminin subunit alpha-2 OS= <i>Homo sapiens</i> GN=LAMA2 PE=1 SV=4                                              | 0.5585                    | 0.003258 |
| Q9Y4G6     | Talin-2 OS= <i>Homo sapiens</i> GN=TLN2 PE=1 SV=4                                                               | 0.556                     | 4.41E-20 |
| P01715     | Ig lambda chain V-IV region Bau OS= <i>Homo sapiens</i> PE=1 SV=1                                               | 0.5535                    | 0.000713 |
| P98160     | Basement membrane-specific heparan sulfate proteoglycan core protein OS= <i>Homo sapiens</i> GN=HSPG2 PE=1 SV=4 | 0.5525                    | 8.13E-32 |
| Q01082     | Spectrin beta chain, non-erythrocytic 1 OS= <i>Homo sapiens</i> GN=SPTBN1 PE=1 SV=2                             | 0.548                     | 2.22E-31 |
| P00533     | Epidermal growth factor receptor OS= <i>Homo sapiens</i> GN=EGFR PE=1 SV=2                                      | 0.5475                    | 0.004924 |
| P00352     | Retinal dehydrogenase 1 OS= <i>Homo sapiens</i> GN=ALDH1A1 PE=1 SV=2                                            | 0.547                     | 3.32E-07 |
| Q15847     | Adipogenesis regulatory factor OS= <i>Homo sapiens</i> GN=ADIRF PE=1 SV=1                                       | 0.547                     | 0.009361 |
| P00387     | NADH-cytochrome b5 reductase 3 OS= <i>Homo sapiens</i> GN=CYB5R3 PE=1 SV=3                                      | 0.546                     | 2.24E-14 |
| P27105     | Erythrocyte band 7 integral membrane protein OS= <i>Homo sapiens</i> GN=STOM PE=1 SV=3                          | 0.544                     | 3.39E-14 |
| P01860     | Ig gamma-3 chain C region OS= <i>Homo sapiens</i> GN=IGHG3 PE=1 SV=2                                            | 0.543                     | 2.29E-07 |
| P16219     | Short-chain specific acyl-CoA dehydrogenase, mitochondrial OS= <i>Homo sapiens</i> GN=ACADS PE=1 SV=1           | 0.5425                    | 8.46E-05 |
| P01023     | Alpha-2-macroglobulin OS= <i>Homo sapiens</i> GN=A2M PE=1 SV=3                                                  | 0.54                      | 1.28E-35 |
| P01857     | Ig gamma-1 chain C region OS= <i>Homo sapiens</i> GN=IGHG1 PE=1 SV=1                                            | 0.539                     | 3.17E-68 |
| P54289     | Voltage-dependent calcium channel subunit alpha-2/delta-1 OS= <i>Homo sapiens</i> GN=CACNA2D1 PE=1 SV=3         | 0.538                     | 0.002164 |
| P06727     | Apolipoprotein A-IV OS= <i>Homo sapiens</i> GN=APOA4 PE=1 SV=3                                                  | 0.535                     | 0.000564 |
| P02652     | Apolipoprotein A-II OS= <i>Homo sapiens</i> GN=APOA2 PE=1 SV=1                                                  | 0.534                     | 5.74E-07 |
| Q9NTX5     | Ethylmalonyl-CoA decarboxylase OS= <i>Homo sapiens</i> GN=ECHDC1 PE=1 SV=2                                      | 0.5335                    | 2.05E-05 |
| P04275     | von Willebrand factor OS= <i>Homo sapiens</i> GN=VWF PE=1 SV=4                                                  | 0.531                     | 2.95E-20 |
| P04083     | Annexin A1 OS= <i>Homo sapiens</i> GN=ANXA1 PE=1 SV=2                                                           | 0.529                     | 5.73E-18 |
| P26447     | Protein S100-A4 OS= <i>Homo sapiens</i> GN=S100A4 PE=1 SV=1                                                     | 0.526                     | 0.00022  |
| O94911     | ATP-binding cassette sub-family A member 8 OS= <i>Homo sapiens</i> GN=ABCA8 PE=1 SV=3                           | 0.524                     | 0.001428 |
| O76070     | Gamma-synuclein OS= <i>Homo sapiens</i> GN=SNCG PE=1 SV=2                                                       | 0.518                     | 8.58E-06 |
| P23229     | Integrin alpha-6 OS= <i>Homo sapiens</i> GN=ITGA6 PE=1 SV=5                                                     | 0.518                     | 0.000497 |
| O95810     | Serum deprivation-response protein OS= <i>Homo sapiens</i> GN=SDPR PE=1 SV=3                                    | 0.514                     | 0.000148 |
| Q6NY19     | KN motif and ankyrin repeat domain-containing protein 3 OS= <i>Homo sapiens</i> GN=KANK3 PE=2 SV=1              | 0.5135                    | 0.005888 |
| P07942     | Laminin subunit beta-1 OS= <i>Homo sapiens</i> GN=LAMB1 PE=1 SV=2                                               | 0.513                     | 2.26E-13 |
| P08697     | Alpha-2-antiplasmin OS= <i>Homo sapiens</i> GN=SERPINF2 PE=1 SV=3                                               | 0.51                      | 3.55E-06 |
| P22105     | Tenascin-X OS= <i>Homo sapiens</i> GN=TNXB PE=1 SV=3                                                            | 0.508                     | 8.7E-30  |
| Q86VB7     | Scavenger receptor cysteine-rich type 1 protein M130 OS= <i>Homo sapiens</i> GN=CD163 PE=1 SV=2                 | 0.506                     | 1.55E-10 |
| Q14112     | Nidogen-2 OS= <i>Homo sapiens</i> GN=NID2 PE=1 SV=3                                                             | 0.504                     | 9.4E-07  |
| O14558     | Heat shock protein beta-6 OS= <i>Homo sapiens</i> GN=HSPB6 PE=1 SV=2                                            | 0.493                     | 0.000232 |
| P07195     | L-lactate dehydrogenase B chain OS= <i>Homo sapiens</i> GN=LDHB PE=1 SV=2                                       | 0.493                     | 1.61E-11 |
| O14791     | Apolipoprotein L1 OS= <i>Homo sapiens</i> GN=APOL1 PE=1 SV=5                                                    | 0.491                     | 3.92E-05 |

Table SIV. Continued.

| Protein ID | Protein description                                                                                        | Ratio (cancer vs. normal) | P-value  |
|------------|------------------------------------------------------------------------------------------------------------|---------------------------|----------|
| P01766     | Ig heavy chain V-III region BRO OS= <i>Homo sapiens</i> PE=1 SV=1                                          | 0.49                      | 0.001082 |
| Q9NVD7     | Alpha-parvin OS= <i>Homo sapiens</i> GN=PARVA PE=1 SV=1                                                    | 0.49                      | 1.64E-07 |
| P15088     | Mast cell carboxypeptidase A OS= <i>Homo sapiens</i> GN=CPA3 PE=1 SV=2                                     | 0.4855                    | 6.16E-05 |
| P07225     | Vitamin K-dependent protein S OS= <i>Homo sapiens</i> GN=PROS1 PE=1 SV=1                                   | 0.4845                    | 0.000876 |
| P06703     | Protein S100-A6 OS= <i>Homo sapiens</i> GN=S100A6 PE=1 SV=1                                                | 0.482                     | 0.000436 |
| Q6NZI2     | Polymerase I and transcript release factor OS= <i>Homo sapiens</i> GN=PTRF PE=1 SV=1                       | 0.482                     | 1.24E-07 |
| P08572     | Collagen alpha-2(IV) chain OS= <i>Homo sapiens</i> GN=COL4A2 PE=1 SV=4                                     | 0.479                     | 1.09E-14 |
| Q96AC1     | Fermitin family homolog 2 OS= <i>Homo sapiens</i> GN=FERMT2 PE=1 SV=1                                      | 0.477                     | 1.09E-10 |
| P06737     | Glycogen phosphorylase, liver form OS= <i>Homo sapiens</i> GN=PYGL PE=1 SV=4                               | 0.4765                    | 3.3E-10  |
| O43301     | Heat shock 70 kDa protein 12A OS= <i>Homo sapiens</i> GN=HSPA12A PE=1 SV=2                                 | 0.476                     | 1.06E-06 |
| P07738     | Bisphosphoglycerate mutase OS= <i>Homo sapiens</i> GN=BPGM PE=1 SV=2                                       | 0.476                     | 3.02E-05 |
| Q687X5     | Metalloreductase STEAP4 OS= <i>Homo sapiens</i> GN=STEAP4 PE=1 SV=1                                        | 0.476                     | 0.00341  |
| Q6NUM9     | All-trans-retinol 13,14-reductase OS= <i>Homo sapiens</i> GN=RETSAT PE=1 SV=2                              | 0.476                     | 0.000171 |
| O00159     | Unconventional myosin-Ic OS= <i>Homo sapiens</i> GN=MYO1C PE=1 SV=4                                        | 0.47                      | 6.17E-19 |
| Q16851     | UTP--glucose-1-phosphate uridylyltransferase OS= <i>Homo sapiens</i> GN=UGP2 PE=1 SV=5                     | 0.469                     | 2.52E-18 |
| Q16836     | Hydroxyacyl-coenzyme A dehydrogenase, mitochondrial OS= <i>Homo sapiens</i> GN=HADH PE=1 SV=3              | 0.4665                    | 2.37E-05 |
| P00966     | Argininosuccinate synthase OS= <i>Homo sapiens</i> GN=ASS1 PE=1 SV=2                                       | 0.466                     | 5.42E-08 |
| Q01469     | Fatty acid-binding protein, epidermal OS= <i>Homo sapiens</i> GN=FABP5 PE=1 SV=3                           | 0.4595                    | 6.48E-11 |
| P11532     | Dystrophin OS= <i>Homo sapiens</i> GN=DMD PE=1 SV=3                                                        | 0.4575                    | 1.89E-05 |
| P48163     | NADP-dependent malic enzyme OS= <i>Homo sapiens</i> GN=ME1 PE=1 SV=1                                       | 0.455                     | 0.003812 |
| P02462     | Collagen alpha-1(IV) chain OS= <i>Homo sapiens</i> GN=COL4A1 PE=1 SV=3                                     | 0.454                     | 1.74E-12 |
| P01833     | Polymetric immunoglobulin receptor OS= <i>Homo sapiens</i> GN=PIGR PE=1 SV=4                               | 0.453                     | 8.44E-05 |
| P11171     | Protein 4.1 OS= <i>Homo sapiens</i> GN=EPB41 PE=1 SV=4                                                     | 0.45                      | 1.7E-06  |
| P02675     | Fibrinogen beta chain OS= <i>Homo sapiens</i> GN=FGB PE=1 SV=2                                             | 0.447                     | 1.48E-27 |
| P62070     | Ras-related protein R-Ras2 OS= <i>Homo sapiens</i> GN=RRAS2 PE=1 SV=1                                      | 0.444                     | 0.00112  |
| P39059     | Collagen alpha-1(XV) chain OS= <i>Homo sapiens</i> GN=COL15A1 PE=1 SV=2                                    | 0.435                     | 7.28E-06 |
| P01705     | Ig lambda chain V-II region NEI OS= <i>Homo sapiens</i> PE=1 SV=1                                          | 0.433                     | 0.001372 |
| P55290     | Cadherin-13 OS= <i>Homo sapiens</i> GN=CDH13 PE=1 SV=1                                                     | 0.432                     | 0.007346 |
| P14543     | Nidogen-1 OS= <i>Homo sapiens</i> GN=NID1 PE=1 SV=3                                                        | 0.429                     | 1.34E-13 |
| P02671     | Fibrinogen alpha chain OS= <i>Homo sapiens</i> GN=FGA PE=1 SV=2                                            | 0.427                     | 1.77E-37 |
| Q9BX66     | Sorbin and SH3 domain-containing protein 1 OS= <i>Homo sapiens</i> GN=SORBS1 PE=1 SV=3                     | 0.4265                    | 2.65E-07 |
| P24298     | Alanine aminotransferase 1 OS= <i>Homo sapiens</i> GN=GPT PE=1 SV=3                                        | 0.4235                    | 0.000311 |
| P00746     | Complement factor D OS= <i>Homo sapiens</i> GN=CFD PE=1 SV=5                                               | 0.4195                    | 0.000662 |
| P42330     | Aldo-keto reductase family 1 member C3 OS= <i>Homo sapiens</i> GN=AKR1C3 PE=1 SV=4                         | 0.418                     | 6.51E-06 |
| O75781     | Paralemmin-1 OS= <i>Homo sapiens</i> GN=PALM PE=1 SV=2                                                     | 0.416                     | 0.000497 |
| P31323     | cAMP-dependent protein kinase type II-beta regulatory subunit OS= <i>Homo sapiens</i> GN=PRKAR2B PE=1 SV=3 | 0.412                     | 0.00013  |
| Q13683     | Integrin alpha-7 OS= <i>Homo sapiens</i> GN=ITGA7 PE=1 SV=3                                                | 0.411                     | 1.82E-06 |
| P61764     | Syntaxin-binding protein 1 OS= <i>Homo sapiens</i> GN=STXBP1 PE=1 SV=1                                     | 0.409                     | 0.002761 |

Table SIV. Continued.

| Protein ID | Protein description                                                                                | Ratio (cancer vs. normal) | P-value  |
|------------|----------------------------------------------------------------------------------------------------|---------------------------|----------|
| Q13663     | Laminin subunit alpha-4 OS= <i>Homo sapiens</i> GN=LAMA4 PE=1 SV=4                                 | 0.408                     | 6.88E-13 |
| P55268     | Laminin subunit beta-2 OS= <i>Homo sapiens</i> GN=LAMB2 PE=1 SV=2                                  | 0.398                     | 2.13E-28 |
| Q5TDH0     | Protein DDI1 homolog 2 OS= <i>Homo sapiens</i> GN=DDI2 PE=1 SV=1                                   | 0.3975                    | 0.005594 |
| P05091     | Aldehyde dehydrogenase, mitochondrial OS= <i>Homo sapiens</i> GN=ALDH2 PE=1 SV=2                   | 0.395                     | 7.35E-06 |
| Q03135     | Caveolin-1 OS= <i>Homo sapiens</i> GN=CAV1 PE=1 SV=4                                               | 0.395                     | 1.28E-11 |
| P48509     | CD151 antigen OS= <i>Homo sapiens</i> GN=CD151 PE=1 SV=3                                           | 0.3945                    | 3.57E-06 |
| P43121     | Cell surface glycoprotein MUC18 OS= <i>Homo sapiens</i> GN=MCAM PE=1 SV=2                          | 0.393                     | 3.68E-08 |
| P11047     | Laminin subunit gamma-1 OS= <i>Homo sapiens</i> GN=LAMC1 PE=1 SV=3                                 | 0.3905                    | 2.57E-23 |
| P23141     | Liver carboxylesterase 1 OS= <i>Homo sapiens</i> GN=CES1 PE=1 SV=2                                 | 0.389                     | 2.9E-07  |
| P51636     | Caveolin-2 OS= <i>Homo sapiens</i> GN=CAV2 PE=1 SV=2                                               | 0.387                     | 0.004128 |
| P12273     | Prolactin-inducible protein OS= <i>Homo sapiens</i> GN=PIP PE=1 SV=1                               | 0.386                     | 3.52E-31 |
| P33121     | Long-chain-fatty-acid--CoA ligase 1 OS= <i>Homo sapiens</i> GN=ACSL1 PE=1 SV=1                     | 0.383                     | 1.12E-16 |
| Q92781     | 11-cis retinol dehydrogenase OS= <i>Homo sapiens</i> GN=RDH5 PE=1 SV=1                             | 0.373                     | 0.002732 |
| P02647     | Apolipoprotein A-I OS= <i>Homo sapiens</i> GN=APOA1 PE=1 SV=1                                      | 0.369                     | 1.81E-67 |
| P21397     | Amine oxidase [flavin-containing] A OS= <i>Homo sapiens</i> GN=MAOA PE=1 SV=1                      | 0.3655                    | 1.62E-06 |
| P0DOY2     | Ig lambda-2 chain C regions OS= <i>Homo sapiens</i> GN=IGLC2 PE=1 SV=1                             | 0.363                     | 0.002176 |
| Q9NP78     | ATP-binding cassette sub-family B member 9 OS= <i>Homo sapiens</i> GN=ABCB9 PE=1 SV=1              | 0.361                     | 0.006078 |
| P63096     | Guanine nucleotide-binding protein G(i) subunit alpha-1 OS= <i>Homo sapiens</i> GN=GNAI1 PE=1 SV=2 | 0.357                     | 0.000178 |
| O76061     | Stanniocalcin-2 OS= <i>Homo sapiens</i> GN=STC2 PE=1 SV=1                                          | 0.3525                    | 0.000914 |
| Q9NZN4     | EH domain-containing protein 2 OS= <i>Homo sapiens</i> GN=EHD2 PE=1 SV=2                           | 0.352                     | 3.22E-21 |
| P02679     | Fibrinogen gamma chain OS= <i>Homo sapiens</i> GN=FGG PE=1 SV=3                                    | 0.347                     | 5.36E-28 |
| P22676     | Calretinin OS= <i>Homo sapiens</i> GN=CALB2 PE=1 SV=2                                              | 0.3465                    | 1.05E-06 |
| Q13642     | Four and a half LIM domains protein 1 OS= <i>Homo sapiens</i> GN=FHL1 PE=1 SV=4                    | 0.342                     | 2.72E-08 |
| Q9BRX8     | Redox-regulatory protein FAM213A OS= <i>Homo sapiens</i> GN=FAM213A PE=1 SV=3                      | 0.34                      | 4.48E-09 |
| O60240     | Perilipin-1 OS= <i>Homo sapiens</i> GN=PLIN1 PE=1 SV=2                                             | 0.3295                    | 1.6E-16  |
| Q13361     | Microfibrillar-associated protein 5 OS= <i>Homo sapiens</i> GN=MFAP5 PE=1 SV=1                     | 0.328                     | 0.001865 |
| P02792     | Ferritin light chain OS= <i>Homo sapiens</i> GN=FTL PE=1 SV=2                                      | 0.324                     | 0.000142 |
| Q05469     | Hormone-sensitive lipase OS= <i>Homo sapiens</i> GN=LIPE PE=1 SV=4                                 | 0.323                     | 1.22E-10 |
| P02730     | Band 3 anion transport protein OS= <i>Homo sapiens</i> GN=SLC4A1 PE=1 SV=3                         | 0.322                     | 4.59E-08 |
| P07451     | Carbonic anhydrase 3 OS= <i>Homo sapiens</i> GN=CA3 PE=1 SV=3                                      | 0.319                     | 3.35E-05 |
| O00763     | Acetyl-CoA carboxylase 2 OS= <i>Homo sapiens</i> GN=ACACB PE=1 SV=3                                | 0.309                     | 0.000547 |
| P35612     | Beta-adducin OS= <i>Homo sapiens</i> GN=ADD2 PE=1 SV=3                                             | 0.309                     | 0.000879 |
| P02549     | Spectrin alpha chain, erythrocytic 1 OS= <i>Homo sapiens</i> GN=SPTA1 PE=1 SV=5                    | 0.306                     | 3.31E-26 |
| P04040     | Catalase OS= <i>Homo sapiens</i> GN=CAT PE=1 SV=3                                                  | 0.2995                    | 1.39E-18 |
| O75891     | Cytosolic 10-formyltetrahydrofolate dehydrogenase OS= <i>Homo sapiens</i> GN=ALDH1L1 PE=1 SV=2     | 0.297                     | 1.07E-08 |
| Q16853     | Membrane primary amine oxidase OS= <i>Homo sapiens</i> GN=AOC3 PE=1 SV=3                           | 0.297                     | 2.46E-20 |
| Q6UXB8     | Peptidase inhibitor 16 OS= <i>Homo sapiens</i> GN=PI16 PE=1 SV=1                                   | 0.297                     | 0.001811 |
| P00915     | Carbonic anhydrase 1 OS= <i>Homo sapiens</i> GN=CA1 PE=1 SV=2                                      | 0.296                     | 6.97E-23 |

Table SIV. Continued.

| Protein ID | Protein description                                                                                                    | Ratio (cancer vs. normal) | P-value  |
|------------|------------------------------------------------------------------------------------------------------------------------|---------------------------|----------|
| P21695     | Glycerol-3-phosphate dehydrogenase [NAD(+)], cytoplasmic OS= <i>Homo sapiens</i> GN=GPD1 PE=1 SV=4                     | 0.292                     | 1.71E-18 |
| P00918     | Carbonic anhydrase 2 OS= <i>Homo sapiens</i> GN=CA2 PE=1 SV=2                                                          | 0.2845                    | 6.86E-10 |
| P02654     | Apolipoprotein C-1 OS= <i>Homo sapiens</i> GN=APOC1 PE=1 SV=1                                                          | 0.283                     | 3.76E-05 |
| P11277     | Spectrin beta chain, erythrocytic OS= <i>Homo sapiens</i> GN=SPTB PE=1 SV=5                                            | 0.276                     | 1.8E-27  |
| P02511     | Alpha-crystallin B chain OS= <i>Homo sapiens</i> GN=CRYAB PE=1 SV=2                                                    | 0.275                     | 1.68E-08 |
| O95969     | Secretoglobin family 1D member 2 OS= <i>Homo sapiens</i> GN=SCGB1D2 PE=2 SV=1                                          | 0.27                      | 0.004236 |
| P16157     | Ankyrin-1 OS= <i>Homo sapiens</i> GN=ANK1 PE=1 SV=3                                                                    | 0.263                     | 4.28E-25 |
| P15090     | Fatty acid-binding protein, adipocyte OS= <i>Homo sapiens</i> GN=FABP4 PE=1 SV=3                                       | 0.262                     | 7.87E-53 |
| P16452     | Erythrocyte membrane protein band 4.2 OS= <i>Homo sapiens</i> GN=EPB42 PE=1 SV=3                                       | 0.2605                    | 8.99E-06 |
| P16671     | Platelet glycoprotein 4 OS= <i>Homo sapiens</i> GN=CD36 PE=1 SV=2                                                      | 0.26                      | 7.48E-14 |
| A8MVG2     | Putative selection and upkeep of intraepithelial T-cells protein 1 homolog OS= <i>Homo sapiens</i> GN=SKINT1 PE=5 SV=2 | 0.259                     | 0.000392 |
| Q96Q06     | Perilipin-4 OS= <i>Homo sapiens</i> GN=PLIN4 PE=2 SV=2                                                                 | 0.253                     | 1.13E-48 |
| P00325     | Alcohol dehydrogenase 1B OS= <i>Homo sapiens</i> GN=ADH1B PE=1 SV=2                                                    | 0.2495                    | 5.63E-55 |
| P69891     | Hemoglobin subunit gamma-1 OS= <i>Homo sapiens</i> GN=HBG1 PE=1 SV=2                                                   | 0.246                     | 1.14E-20 |
| P02042     | Hemoglobin subunit delta OS= <i>Homo sapiens</i> GN=HBD PE=1 SV=2                                                      | 0.2345                    | 5.33E-25 |
| P69905     | Hemoglobin subunit alpha OS= <i>Homo sapiens</i> GN=HBA1 PE=1 SV=2                                                     | 0.206                     | 4.43E-75 |
| P68871     | Hemoglobin subunit beta OS= <i>Homo sapiens</i> GN=HBB PE=1 SV=2                                                       | 0.203                     | 6.9E-166 |
